# Supplementary material for: Flexibility in MuA Transposase Family Protein Structures: Functional Mapping with Scanning Mutagenesis and Sequence Alignment of Protein Homologues
Source: PubMed Central journal article supplement (PMC3362531; doi:10.1371/journal.pone.0037922), 2012-05-29
Supplement: pone.0037922.s003.pdf [file pone.0037922.s003.pdf]

**Table S1. Compilation of data on MuA variants analyzed<sup>a</sup>.**

| Clone | Insertion site:<br>nucleotide | Insertion site:<br>amino acid (frame) | Insertion<br>translation | Number of<br>papillae <sup>b</sup> | Activity<br>(% of wt) |
|-------|-------------------------------|---------------------------------------|--------------------------|------------------------------------|-----------------------|
| 1     | 6                             | 2 (3)                                 | DAAAM                    | 268 ± 26                           | 114                   |
| 2     | 15                            | 5 (3)                                 | VAAAW                    | 190 ± 27                           | 81                    |
| 3     | 23                            | 8 (2)                                 | MRPQP                    | 191 ± 44                           | 82                    |
| 4     | 24                            | 8 (3)                                 | NAAAP                    | 94 ± 15                            | 40                    |
| 5     | 34                            | 12 (1)                                | CGRSA                    | 177 ± 27                           | 75                    |
| 6     | 45                            | 15 (3)                                | GAAAP                    | 185 ± 14                           | 79                    |
| 7     | 46                            | 16 (1)                                | CGRTG                    | 72 ± 3                             | 31                    |
| 8     | 66                            | 22 (3)                                | GAAAA                    | 101 ± 15                           | 43                    |
| 9     | 67                            | 23 (1)                                | CGRTG                    | 71 ± 11                            | 30                    |
| 10    | 76                            | 26 (1)                                | CGRIY                    | 56 ± 6                             | 24                    |
| 11    | 82                            | 28 (1)                                | CGRIA                    | 66 ± 19                            | 28                    |
| 12    | 91                            | 31 (1)                                | CGRKQ                    | 38 ± 6                             | 16                    |
| 13    | 106                           | 36 (1)                                | CGRNR                    | 55 ± 10                            | 24                    |
| 14    | 112                           | 38 (1)                                | CGRTR                    | 79 ± 11                            | 34                    |
| 15    | 130                           | 44 (1)                                | CGRSG                    | 116 ± 4                            | 50                    |
| 16    | 135                           | 45 (3)                                | AAAAK                    | 133 ± 17                           | 57                    |
| 17    | 162                           | 54 (3)                                | PAAAL                    | 74 ± 5                             | 32                    |
| 18    | 165                           | 55 (3)                                | VAAAP                    | 74 ± 5                             | 31                    |
| 19    | 197                           | 66 (2)                                | VRPQQ                    | 302 ± 11                           | 129                   |
| 20    | 198                           | 66 (3)                                | GAAAQ                    | 281 ± 30                           | 120                   |
| 21    | 199                           | 67 (1)                                | CGRKG                    | 250 ± 6                            | 107                   |
| 22    | 218                           | 73 (2)                                | VRPHL                    | 200 ± 27                           | 85                    |
| 23    | 219                           | 73 (3)                                | GAAAL                    | 197 ± 8                            | 84                    |
| 24    | 238                           | 80 (1)                                | CGRTR                    | 386 ± 14                           | 165                   |
| 25    | 249                           | 83 (3)                                | DAAAL                    | 223 ± 8                            | 95                    |
| 26    | 250                           | 84 (1)                                | CGRME                    | 244 ± 10                           | 104                   |
| 27    | 251                           | 84 (2)                                | VRPQE                    | 339 ± 10                           | 145                   |
| 28    | 256                           | 86 (1)                                | CGRTH                    | 332 ± 57                           | 142                   |
| 29    | 257                           | 86 (2)                                | VRPHH                    | 364 ± 21                           | 155                   |
| 30    | 258                           | 86 (3)                                | DAAAH                    | 296 ± 30                           | 126                   |
| 31    | 272                           | 91 (2)                                | VRPHE                    | 122 ± 16                           | 52                    |
| 32    | 279                           | 93 (3)                                | CAAAL                    | 1 ± 1                              | 0                     |
| 33    | 281                           | 94 (2)                                | MRPQW                    | 0 ± 0                              | 0                     |
| 34    | 300                           | 100 (3)                               | SAAAA                    | 0 ± 0                              | 0                     |
| 35    | 313                           | 105 (1)                               | CGRKR                    | 0 ± 0                              | 0                     |
| 36    | 316                           | 106 (1)                               | CGRSR                    | 0 ± 0                              | 0                     |
| 37    | 321                           | 107 (3)                               | AAAAL                    | 0 ± 0                              | 0                     |
| 38    | 339                           | 113 (3)                               | AAAAP                    | 0 ± 0                              | 0                     |
| 39    | 370                           | 124 (1)                               | CGRNQ                    | 159 ± 11                           | 68                    |
| 40    | 372                           | 124 (3)                               | GAAAQ                    | 131 ± 7                            | 56                    |

|    |     |         |       |          |     |
|----|-----|---------|-------|----------|-----|
| 41 | 373 | 125 (1) | CGRKG | 249 ± 5  | 106 |
| 42 | 383 | 128 (2) | MRPQT | 145 ± 14 | 62  |
| 43 | 398 | 133 (2) | MRPHA | 0 ± 0    | 0   |
| 44 | 407 | 136 (2) | VRPHA | 3 ± 1    | 1   |
| 45 | 418 | 140 (1) | CGRNQ | 50 ± 7   | 22  |
| 46 | 427 | 143 (1) | CGRSA | 4 ± 2    | 2   |
| 47 | 440 | 147 (2) | VRPQR | 0 ± 0    | 0   |
| 48 | 445 | 149 (1) | CGRNK | 0 ± 0    | 0   |
| 49 | 451 | 151 (1) | CGRNY | 0 ± 0    | 0   |
| 50 | 455 | 152 (2) | VRPHQ | 0 ± 0    | 0   |
| 51 | 456 | 152 (3) | VAAAQ | 1 ± 1    | 0   |
| 52 | 457 | 153 (1) | CGRKV | 176 ± 10 | 75  |
| 53 | 462 | 154 (3) | NAAAQ | 0 ± 0    | 0   |
| 54 | 483 | 161 (3) | RAAAL | 0 ± 0    | 0   |
| 55 | 486 | 162 (3) | AAAAA | 0 ± 0    | 0   |
| 56 | 495 | 165 (3) | VAAAL | 0 ± 0    | 0   |
| 57 | 501 | 167 (3) | GAAAG | 0 ± 0    | 0   |
| 58 | 502 | 168 (1) | CGRNG | 0 ± 0    | 0   |
| 59 | 507 | 169 (3) | GAAAR | 6 ± 1    | 2   |
| 60 | 517 | 173 (1) | CGRTR | 4 ± 1    | 2   |
| 61 | 518 | 173 (2) | LRPHR | 2 ± 2    | 1   |
| 62 | 521 | 174 (2) | MRPHA | 4 ± 3    | 2   |
| 63 | 547 | 183 (1) | CGRTE | 0 ± 0    | 0   |
| 64 | 557 | 186 (2) | LRPHW | 3 ± 2    | 1   |
| 65 | 571 | 191 (1) | CGRIA | 0 ± 0    | 0   |
| 66 | 574 | 192 (1) | CGRTD | 0 ± 0    | 0   |
| 67 | 582 | 194 (3) | RAAAL | 0 ± 0    | 0   |
| 68 | 587 | 196 (2) | LRPQR | 0 ± 0    | 0   |
| 69 | 588 | 196 (3) | DAAAP | 0 ± 0    | 0   |
| 70 | 604 | 202 (1) | CGRIR | 0 ± 0    | 0   |
| 71 | 607 | 203 (1) | CGRSK | 0 ± 0    | 0   |
| 72 | 614 | 205 (2) | VRPHY | 0 ± 0    | 0   |
| 73 | 618 | 206 (3) | RAAAE | 0 ± 0    | 0   |
| 74 | 624 | 208 (3) | DAAAL | 0 ± 1    | 0   |
| 75 | 629 | 210 (2) | VRPQL | 0 ± 0    | 0   |
| 76 | 630 | 210 (3) | AAAAL | 0 ± 0    | 0   |
| 77 | 632 | 211 (2) | VRPQA | 0 ± 0    | 0   |
| 78 | 646 | 216 (1) | CGRNG | 1 ± 0    | 0   |
| 79 | 663 | 221 (3) | RAAAS | 0 ± 0    | 0   |
| 80 | 664 | 222 (1) | CGRTR | 0 ± 0    | 0   |
| 81 | 682 | 228 (1) | CGRSR | 0 ± 0    | 0   |
| 82 | 683 | 228 (2) | MRPHR | 0 ± 1    | 0   |
| 83 | 699 | 233 (3) | DAAAD | 0 ± 0    | 0   |
| 84 | 701 | 234 (2) | VRPHE | 0 ± 0    | 0   |
| 85 | 718 | 240 (1) | CGRTC | 0 ± 0    | 0   |

|     |      |         |       |          |     |
|-----|------|---------|-------|----------|-----|
| 86  | 721  | 241 (1) | CGRSR | 0 ± 1    | 0   |
| 87  | 724  | 242 (1) | CGRSE | 0 ± 0    | 0   |
| 88  | 730  | 244 (1) | CGRSE | 0 ± 0    | 0   |
| 89  | 734  | 245 (2) | VRPQH | 0 ± 0    | 0   |
| 90  | 739  | 247 (1) | CGRTL | 0 ± 0    | 0   |
| 91  | 740  | 247 (2) | MRPQL | 0 ± 0    | 0   |
| 92  | 741  | 247 (3) | IAAAL | 0 ± 0    | 0   |
| 93  | 745  | 249 (1) | CGRMH | 0 ± 0    | 0   |
| 94  | 756  | 252 (3) | AAAAP | 0 ± 0    | 0   |
| 95  | 761  | 254 (2) | LRPQQ | 0 ± 0    | 0   |
| 96  | 764  | 255 (2) | LRPQQ | 0 ± 0    | 0   |
| 97  | 771  | 257 (3) | VAAAT | 0 ± 0    | 0   |
| 98  | 774  | 258 (3) | DAAAV | 0 ± 0    | 0   |
| 99  | 782  | 261 (2) | VRPHL | 0 ± 0    | 0   |
| 100 | 784  | 262 (1) | CGRMD | 0 ± 0    | 0   |
| 101 | 789  | 263 (3) | IAAAA | 0 ± 1    | 0   |
| 102 | 790  | 264 (1) | CGRTM | 0 ± 0    | 0   |
| 103 | 805  | 269 (1) | CGRNG | 0 ± 1    | 0   |
| 104 | 819  | 273 (3) | HAAAL | 0 ± 0    | 0   |
| 105 | 823  | 274 (1) | CGRNN | 0 ± 0    | 0   |
| 106 | 826  | 275 (1) | CGRNV | 0 ± 0    | 0   |
| 107 | 830  | 277 (2) | VRPHF | 0 ± 1    | 0   |
| 108 | 834  | 278 (3) | RAAAV | 0 ± 0    | 0   |
| 109 | 835  | 279 (1) | CGRIR | 0 ± 0    | 0   |
| 110 | 844  | 282 (1) | CGRIN | 364 ± 28 | 156 |
| 111 | 846  | 282 (3) | GAAAN | 313 ± 40 | 134 |
| 112 | 911  | 305 (2) | LRPHW | 0 ± 0    | 0   |
| 113 | 918  | 306 (3) | DAAAC | 0 ± 0    | 0   |
| 114 | 919  | 307 (1) | CGRSD | 0 ± 0    | 0   |
| 115 | 930  | 310 (3) | NAAAE | 0 ± 0    | 0   |
| 116 | 948  | 316 (3) | LAAAR | 0 ± 0    | 0   |
| 117 | 954  | 318 (3) | FAAAS | 0 ± 0    | 0   |
| 118 | 963  | 321 (3) | VAAAD | 0 ± 0    | 0   |
| 119 | 978  | 326 (3) | GAAAY | 0 ± 0    | 0   |
| 120 | 987  | 329 (3) | DAAAP | 24 ± 4   | 10  |
| 121 | 997  | 333 (1) | CGRIH | 0 ± 0    | 0   |
| 122 | 1008 | 336 (3) | DAAAI | 0 ± 0    | 0   |
| 123 | 1012 | 338 (1) | CGRNN | 0 ± 0    | 0   |
| 124 | 1018 | 340 (1) | CGRTR | 0 ± 0    | 0   |
| 125 | 1026 | 342 (3) | AAAAA | 0 ± 1    | 0   |
| 126 | 1029 | 343 (3) | AAAAA | 0 ± 0    | 0   |
| 127 | 1063 | 355 (1) | CGRSY | 3 ± 1    | 1   |
| 128 | 1110 | 370 (3) | IAAAL | 0 ± 0    | 0   |
| 129 | 1113 | 371 (3) | GAAAM | 0 ± 0    | 0   |
| 130 | 1114 | 372 (1) | CGRMG | 0 ± 0    | 0   |

|     |      |         |       |          |     |
|-----|------|---------|-------|----------|-----|
| 131 | 1129 | 377 (1) | CGRNW | 0 ± 0    | 0   |
| 132 | 1135 | 379 (1) | CGRTS | 0 ± 0    | 0   |
| 133 | 1157 | 386 (2) | VRPHW | 0 ± 0    | 0   |
| 134 | 1172 | 391 (2) | VRPQP | 0 ± 0    | 0   |
| 135 | 1189 | 397 (1) | CGRIG | 0 ± 0    | 0   |
| 136 | 1198 | 400 (1) | CGRSG | 0 ± 0    | 0   |
| 137 | 1203 | 401 (3) | DAAAL | 0 ± 0    | 0   |
| 138 | 1211 | 404 (2) | VRPQY | 0 ± 0    | 0   |
| 139 | 1215 | 405 (3) | DAAAV | 0 ± 0    | 0   |
| 140 | 1225 | 409 (1) | CGRNP | 0 ± 1    | 0   |
| 141 | 1232 | 411 (2) | VRPQL | 0 ± 1    | 0   |
| 142 | 1233 | 411 (3) | AAAAL | 0 ± 0    | 0   |
| 143 | 1237 | 413 (1) | CGRTG | 0 ± 0    | 0   |
| 144 | 1247 | 416 (2) | VRPHT | 0 ± 0    | 0   |
| 145 | 1248 | 416 (3) | GAAAT | 0 ± 0    | 0   |
| 146 | 1259 | 420 (2) | LRPHP | 0 ± 0    | 0   |
| 147 | 1262 | 421 (2) | VRPQQ | 0 ± 1    | 0   |
| 148 | 1271 | 424 (2) | VRPQP | 0 ± 0    | 0   |
| 149 | 1273 | 425 (1) | CGRTD | 0 ± 0    | 0   |
| 150 | 1281 | 427 (3) | GAAAY | 0 ± 0    | 0   |
| 151 | 1282 | 428 (1) | CGRNG | 0 ± 1    | 0   |
| 152 | 1283 | 428 (2) | VRPHG | 0 ± 0    | 0   |
| 153 | 1302 | 434 (3) | DAAAA | 0 ± 0    | 0   |
| 154 | 1307 | 436 (2) | LRPQL | 0 ± 0    | 0   |
| 155 | 1308 | 436 (3) | FAAAL | 0 ± 1    | 0   |
| 156 | 1312 | 438 (1) | CGRIL | 0 ± 0    | 0   |
| 157 | 1314 | 438 (3) | NAAAL | 0 ± 0    | 0   |
| 158 | 1326 | 442 (3) | DAAAA | 0 ± 1    | 0   |
| 159 | 1327 | 443 (1) | CGRTE | 0 ± 0    | 0   |
| 160 | 1335 | 445 (3) | AAAAV | 0 ± 0    | 0   |
| 161 | 1350 | 450 (3) | SAAAA | 0 ± 1    | 0   |
| 162 | 1378 | 460 (1) | CGRSG | 32 ± 14  | 14  |
| 163 | 1380 | 460 (3) | GAAAG | 36 ± 5   | 16  |
| 164 | 1381 | 461 (1) | CGRRG | 15 ± 0   | 6   |
| 165 | 1385 | 462 (2) | LRPHK | 19 ± 7   | 8   |
| 166 | 1391 | 464 (2) | LRPHS | 1 ± 1    | 0   |
| 167 | 1392 | 464 (3) | FAAAS | 1 ± 1    | 0   |
| 168 | 1395 | 465 (3) | DAAAF | 0 ± 0    | 0   |
| 169 | 1402 | 468 (1) | CGRNV | 0 ± 0    | 0   |
| 170 | 1420 | 474 (1) | CGRNA | 360 ± 26 | 154 |
| 171 | 1423 | 475 (1) | CGRTR | 356 ± 8  | 152 |
| 172 | 1424 | 475 (2) | MRPHR | 374 ± 4  | 160 |
| 173 | 1428 | 476 (3) | IAAAT | 343 ± 15 | 147 |
| 174 | 1434 | 478 (3) | RAAAV | 352 ± 17 | 151 |
| 175 | 1435 | 479 (1) | CGRMR | 461 ± 19 | 197 |

|     |      |         |       |              |     |
|-----|------|---------|-------|--------------|-----|
| 176 | 1443 | 481 (3) | TAAAP | $8 \pm 3$    | 3   |
| 177 | 1447 | 483 (1) | CGRTE | $0 \pm 0$    | 0   |
| 178 | 1466 | 489 (2) | LRPQL | $0 \pm 0$    | 0   |
| 179 | 1469 | 490 (2) | LRPQL | $0 \pm 0$    | 0   |
| 180 | 1475 | 492 (2) | VRPQP | $0 \pm 0$    | 0   |
| 181 | 1480 | 494 (1) | CGRTE | $0 \pm 0$    | 0   |
| 182 | 1485 | 495 (3) | VAAAA | $0 \pm 0$    | 0   |
| 183 | 1515 | 505 (3) | LAAAT | $0 \pm 0$    | 0   |
| 184 | 1566 | 522 (3) | AAAAM | $0 \pm 1$    | 0   |
| 185 | 1569 | 523 (3) | FAAAA | $0 \pm 0$    | 0   |
| 186 | 1581 | 527 (3) | GAAAA | $55 \pm 14$  | 24  |
| 187 | 1582 | 528 (1) | CGRTG | $173 \pm 17$ | 74  |
| 188 | 1587 | 529 (3) | NAAAV | $18 \pm 2$   | 8   |
| 189 | 1602 | 534 (3) | SAAAV | $0 \pm 0$    | 0   |
| 190 | 1603 | 535 (1) | CGRIR | $0 \pm 0$    | 0   |
| 191 | 1616 | 539 (2) | LRPQQ | $0 \pm 0$    | 0   |
| 192 | 1622 | 541 (2) | LRPQL | $0 \pm 0$    | 0   |
| 193 | 1626 | 542 (3) | SAAAH | $0 \pm 0$    | 0   |
| 194 | 1627 | 543 (1) | CGRNS | $0 \pm 1$    | 0   |
| 195 | 1628 | 543 (2) | MRPHS | $0 \pm 0$    | 0   |
| 196 | 1639 | 547 (1) | CGRNC | $0 \pm 1$    | 0   |
| 197 | 1665 | 555 (3) | CAAAI | $0 \pm 0$    | 0   |
| 198 | 1682 | 561 (2) | VRPHL | $0 \pm 0$    | 0   |
| 199 | 1708 | 570 (1) | CGRTA | $0 \pm 0$    | 0   |
| 200 | 1710 | 570 (3) | AAAAA | $0 \pm 0$    | 0   |
| 201 | 1717 | 573 (1) | CGRSR | $0 \pm 0$    | 0   |
| 202 | 1718 | 573 (2) | VRPHR | $0 \pm 0$    | 0   |
| 203 | 1721 | 574 (2) | LRPHE | $0 \pm 0$    | 0   |
| 204 | 1729 | 577 (1) | CGRSR | $0 \pm 1$    | 0   |
| 205 | 1767 | 589 (3) | IAAAA | $0 \pm 0$    | 0   |
| 206 | 1770 | 590 (3) | NAAAI | $0 \pm 0$    | 0   |
| 207 | 1776 | 592 (3) | HAAAA | $0 \pm 0$    | 0   |
| 208 | 1796 | 599 (2) | VRPQL | $0 \pm 0$    | 0   |
| 209 | 1797 | 599 (3) | DAAAL | $0 \pm 0$    | 0   |
| 210 | 1808 | 603 (2) | LRPHE | $0 \pm 0$    | 0   |
| 211 | 1811 | 604 (2) | LRPQL | $84 \pm 25$  | 36  |
| 212 | 1821 | 607 (3) | IAAAQ | $93 \pm 12$  | 40  |
| 213 | 1844 | 615 (2) | LRPQE | $44 \pm 2$   | 19  |
| 214 | 1867 | 623 (1) | CGRIR | $280 \pm 14$ | 103 |
| 215 | 1874 | 625 (2) | VRPHS | $268 \pm 24$ | 114 |
| 216 | 1875 | 625 (3) | GAAAS | $272 \pm 19$ | 116 |
| 217 | 1884 | 628 (3) | DAAAT | $231 \pm 9$  | 99  |
| 218 | 1893 | 631 (3) | NAAAV | $273 \pm 16$ | 117 |
| 219 | 1918 | 640 (1) | CGRKY | $211 \pm 8$  | 90  |
| 220 | 1932 | 644 (3) | DAAAR | $285 \pm 6$  | 122 |

|     |      |         |       |          |     |
|-----|------|---------|-------|----------|-----|
| 221 | 1933 | 645 (1) | CGRSD | 206 ± 13 | 88  |
| 222 | 1943 | 648 (2) | MRPHL | 187 ± 4  | 80  |
| 223 | 1951 | 651 (1) | CGRNS | 223 ± 19 | 95  |
| 224 | 1952 | 651 (2) | LRPHS | 241 ± 18 | 103 |
| 225 | 1954 | 652 (1) | CGRTL | 204 ± 7  | 87  |
| 226 | 1955 | 652 (2) | VRPQL | 215 ± 14 | 92  |
| 227 | 1963 | 655 (1) | CGRIL | 242 ± 7  | 104 |
| 228 | 1965 | 655 (3) | DAAAL | 262 ± 4  | 112 |
| 229 | 1969 | 657 (1) | CGRKQ | 256 ± 22 | 109 |
| 230 | 1970 | 657 (2) | MRPQQ | 240 ± 5  | 102 |
| 231 | 1971 | 657 (3) | NAAAQ | 284 ± 3  | 121 |
| 232 | 1974 | 658 (3) | SAAAN | 298 ± 31 | 127 |
| 233 | 1975 | 659 (1) | CGRNR | 294 ± 55 | 125 |

<sup>a</sup>Initially, DNA from 331 plasmid clones was isolated and sequenced to identify insertion sites. Plasmid clones containing the insertion outside the *MuA* ORF (6) and those yielding low quality sequence reads (12) were not included in the table. Several clones were isolated more than once. In these cases, only one representative clone was analyzed.

<sup>b</sup>Papillation analysis was performed by incubation at 30°C for 115 h on standard papillation medium (LB, Ap 100 µg/ml, Cm 20 µg/ml, Xgal 40 µg/ml, lactose 0.05 %, arabinose 0.1%). The data in this column indicate the means and standard deviations (SD) of papillae enumeration from the analyses of three colonies for each data point. The data for wild type *MuA* are 234 ± 22.
